# Supplementary material
Source: Springer Nature journal article supplement (https://www.springermedizin.de/resource/supplementary/12936_2012_2684_MOESM2_ESM.pdf/9545130)

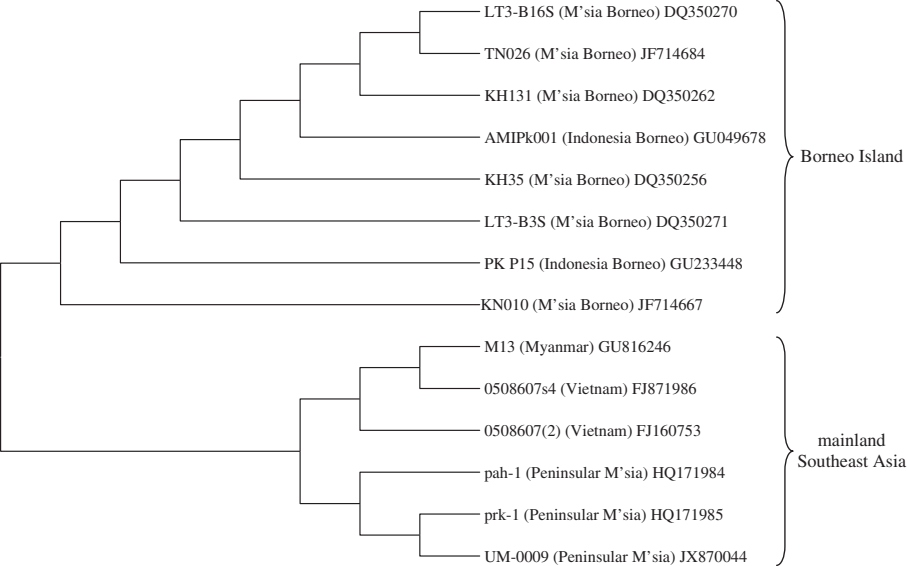

Supplement: MOESM2 [file 9545130]
